# Supplementary material for: Synthesis and Characterization of MnIn2S4/Single-Walled Carbon Nanotube Composites as an Anode Material for Lithium-Ion Batteries
Source: MDPI journal article supplement (doi:10.3390/nano14080716), 2024-04-19
Supplement: s1 [file s1]

# Supporting Information

## Synthesis and characterization of MnIn<sub>2</sub>S<sub>4</sub>/SWCNT composites as an anode material for Lithium-ion batteries

Pei-Jun Wu,<sup>1</sup> Chia-Hung Huang,<sup>2,3</sup> Chien-Te Hsieh<sup>4,5\*</sup> and Wei-Ren Liu<sup>1,\*</sup>

<sup>1</sup>*Department of Chemical Engineering, Chung Yuan Christian University, R&D Center for Membrane Technology, Center for Circular Economy 200 Chung Pei Road, Chungli District, Taoyuan City, 32023, Taiwan, R.O.C.*

<sup>2</sup>*Department of Electrical Engineering, National University of Tainan, No. 33, Sec. 2, Shulin St., West Central District, Tainan City 700, Taiwan;  
chiahung@mail.mirdc.org.tw*

<sup>3</sup>*Metal Industries Research and Development Centre, Kaohsiung 701, Taiwan*

<sup>4</sup>*Department of Chemical Engineering and Materials Science, Yuan Ze University, Taoyuan 32003, Taiwan; cthsieh@saturn.yzu.edu.tw (C.T.H)*

<sup>5</sup>*Department of Mechanical, Aerospace, and Biomedical Engineering, University of Tennessee, Knoxville, TN 37996, United States; cthsieh@saturn.yzu.edu.tw (C.T.H)*

\* Correspondence: wrliu1203@gmail.com ; cthsieh@saturn.yzu.edu.tw ; Tel.:

+886-3-265-4140; fax: +886 3-265-4199

\*E-mail address: [WRLiu1203@gmail.com](mailto:WRLiu1203@gmail.com)

Tel: +886 3-265-4140; fax: +886 3-265-4199

**Table S1.** Grain size of pristine MIS and as-synthesis MIS/SWCNTs.

| Samples    | Grain Size (Å) |
|------------|----------------|
| MIS        | 159            |
| MIS/SWCNTs | 103            |

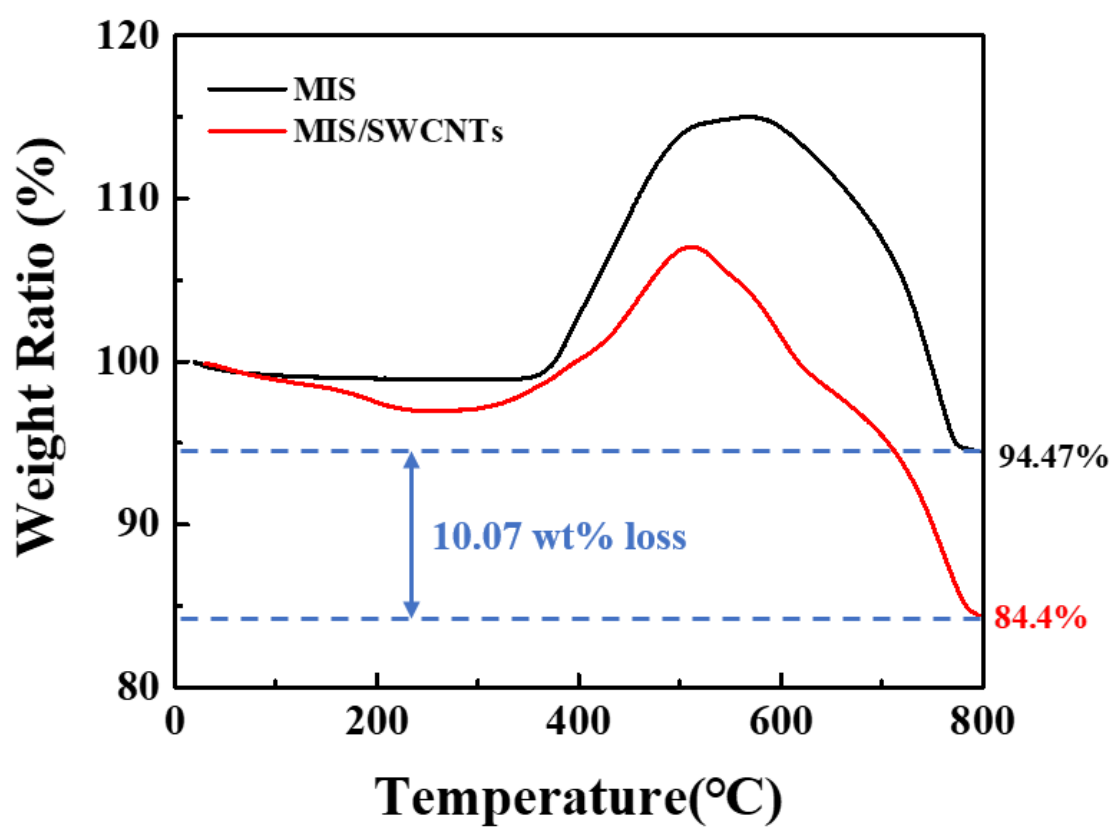

**Figure S1.** TGA of MIS and MIS/SWCNTs at heating rate of 10°C/min in air atmosphere.

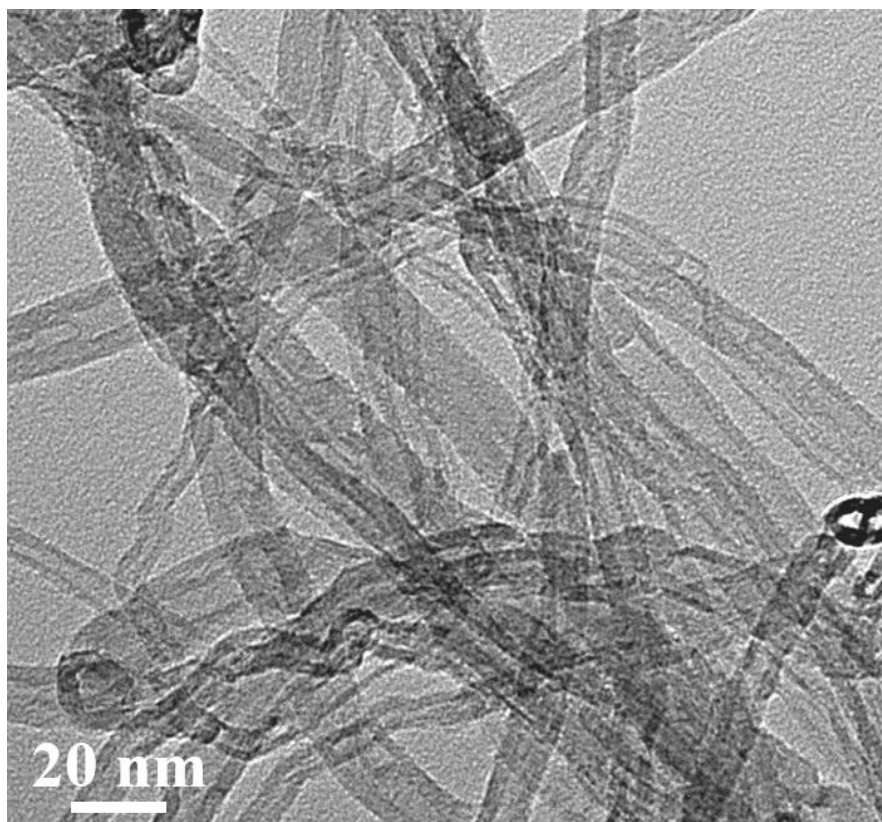

**Figure S2.** HRTEM of image of SWCNTs.

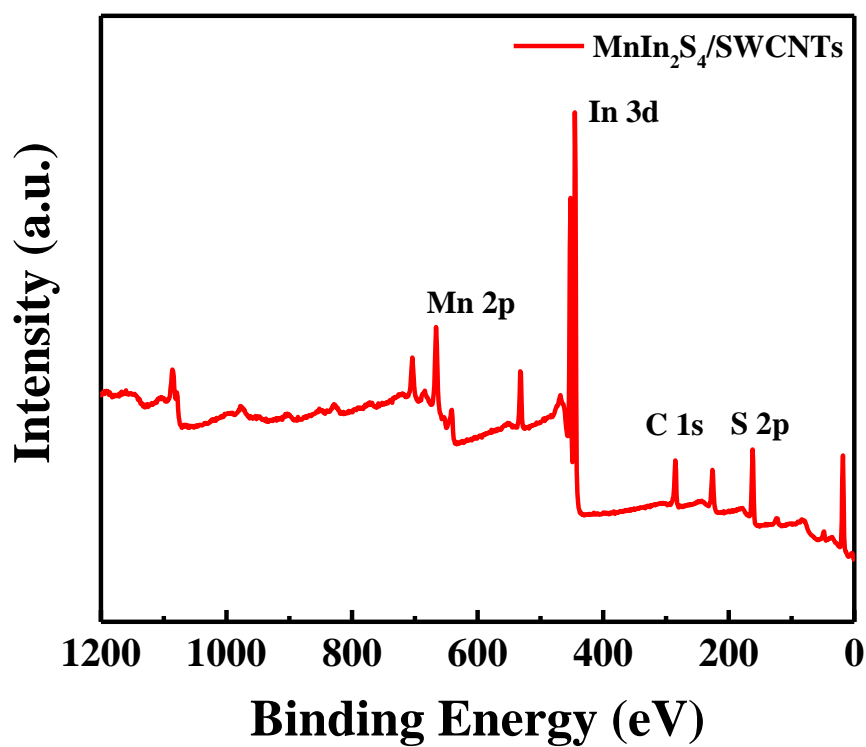

**Figure S3.** XPS survey spectrum of MIS/SWCNTs with high resolution.

**Table S2.** Electrochemical impedance parameters estimated from equivalent circuit.

| Samples    | $R_s$ ( $\Omega$ ) | $R_{SEI}$ ( $\Omega$ ) | $R_{CT}$ ( $\Omega$ ) | Slope | $R^2$ | $D_{Li^+}$ ( $cm^2/s$ ) |
|------------|--------------------|------------------------|-----------------------|-------|-------|-------------------------|
| MIS        | 3.78               | 106.3                  | 72.96                 | 14.57 | 0.890 | $1.7 \times 10^{-14}$   |
| MIS/SWCNTs | 14.83              | 60.2                   | 27.93                 | 4.63  | 0.927 | $1.7 \times 10^{-13}$   |

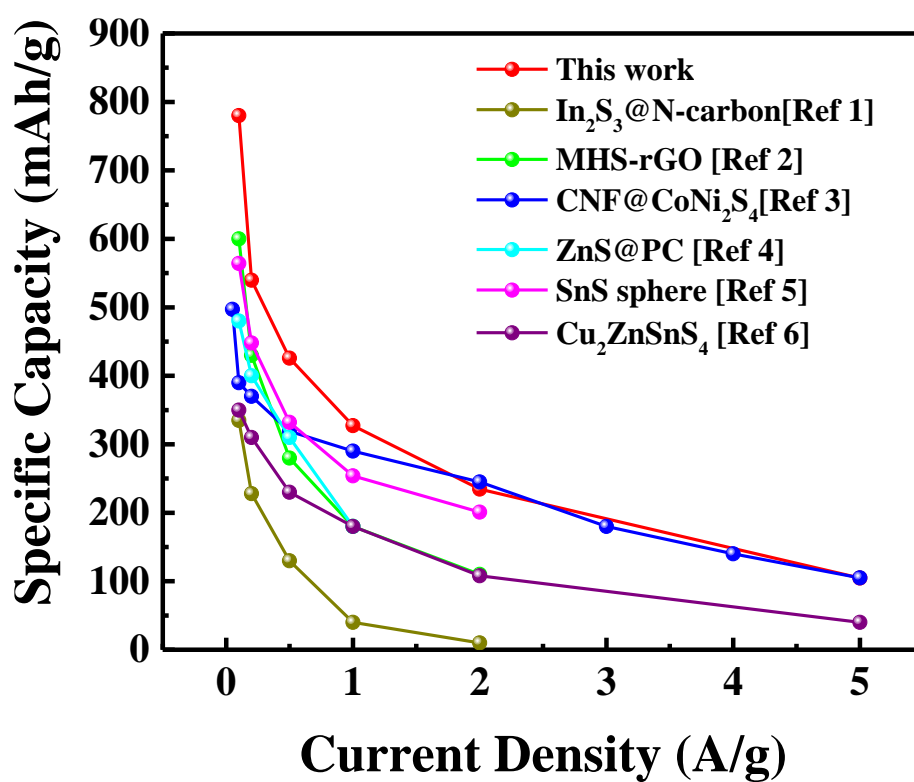

**Figure S4.** Rate performance comparison of as-earlier studies of transition metal sulfide anode for LIBs.

**Table S3.** Comparison of electrochemical performance with reported transition metal sulfide as anode materials for Lithium-ion batteries.

| Samples                                  | *ICE | Capacity<br>(mAh/g) | After n <sup>th</sup><br>cycles | Current<br>density<br>(A/g) | Ref.         |
|------------------------------------------|------|---------------------|---------------------------------|-----------------------------|--------------|
| MIS/SWCNTs                               | 61%  | 536                 | 100                             | 0.2                         | This<br>work |
| In <sub>2</sub> S <sub>3</sub> @N-carbon | 44%  | 485                 | 200                             | 0.1                         | [1]          |
| MHS-rGOs                                 | 69%  | 500                 | 50                              | 0.2                         | [2]          |
| CNF@CoNi <sub>2</sub> S <sub>4</sub>     | n/a  | ~520                | 100                             | 0.1                         | [3]          |
| ZnS@PC                                   | n/a  | 438                 | 300                             | 0.1                         | [4]          |
| SnS sphere                               | 64%  | 414                 | 100                             | 0.1                         | [5]          |
| Cu <sub>2</sub> ZnSnS <sub>4</sub>       | 34%  | 234                 | 30                              | 0.1                         | [6]          |

## References

- [1] L. Sun, X. Liu, T. Ma, L. Zheng, Y. Xu, X. Guo, J. Zhang, "In<sub>2</sub>S<sub>3</sub> nanosheets anchored on N-doped carbon fibers for improved lithium storage performances," *Solid State Ionics*, 329 (2019), 8-14
- [2] D. Chen, H. Quan, G.S. Wang, L. Guo, "Hollow  $\alpha$ -MnS spheres and their hybrids with reduced graphene oxide: synthesis, microwave absorption, and lithium storage properties," *Chempluschem*, 78(8)(2013), 843-851.
- [3] A. Jagadale, X. Zhou, D. Blaisdell, S. Yang, "Carbon nanofibers (CNFs) supported cobalt- nickel sulfide (CoNi<sub>2</sub>S<sub>4</sub>) nanoparticles hybrid anode for high performance lithium ion capacitor," *Scientific Reports*, 8(2018), 1602..
- [4] Y. Fu, Z. Zhang, X. Yang, Y. Gan, W. Chen, "ZnS nanoparticles embedded in

porous carbon matrices as anode materials for lithium ion batteries," *RSC Advances*, 5(16)(2015), 86941-86944.

[5] J. Ren, R.P. Ren, Y.K. Lv, "Hollow spheres constructed by ultrathin SnS sheets for enhanced lithium storage," *Journal of Materials Science*, 55(17)(2020), 7492-7501.

[6] X. Yang, J. Xu, L. Xi, Y. Yao, Q. Yang, C. Chung, C. Lee, "Microwave-assisted synthesis of  $\text{Cu}_2\text{ZnSnS}_4$  nanocrystals as a novel anode material for lithium ion battery," *Journal of Nanoparticle Research*, 14(6)(2012), 931.
